# Supplementary material for: Multi-doped ceria-based composite as a promising low-temperature electrolyte with enhanced ionic conductivity for steam electrolysis
Source: Royal Society of Chemistry journal article supplement (doi:10.1039/d3me00011g), 2023-01-01
Supplement: d3me00011g1.pdf [file d3me00011g1.pdf]

## Supporting Information

### Multi-doped ceria-based composite as a promising low-temperature electrolyte with enhanced ionic conductivity for steam electrolysis

Yuheng Liu<sup>a</sup>, Ming Xu<sup>b</sup>, Yunlong Zhao<sup>b</sup>, Bahman Amini Horri<sup>\*a</sup>

a. School of Chemistry and Chemical Engineering, Faculty of Engineering & Physical Sciences, University of Surrey, GU2 7XH, Guildford, Surrey, United Kingdom

b. Advanced Technology Institute, Faculty of Engineering & Physical Sciences, University of Surrey, GU2 7XH, Guildford, Surrey, United Kingdom

#### Characterisation details

##### Physicochemical characterisation

The lattice parameters were calculated from the following Bragg's equation<sup>1</sup>:

$$\alpha = d (\sqrt{h^2 + k^2 + l^2}) \quad \text{Eq. S1}$$

where  $\alpha$  is the cubic lattice parameter,  $d$  is the lattice spacing between the planes in the atomic lattice and  $h, k$  and  $l$  are the miller indices of the plane of diffraction. The Scherrer's equation was employed to estimate the size of crystallites<sup>1</sup>:

$$D = \frac{0.9\lambda}{\beta \cos(\theta)} \quad \text{Eq. S2}$$

where  $D$  is the mean crystallite size (nm),  $\lambda$  is the X-ray wavelength (nm),  $\beta$  is the line broadening at half maximum intensity (FWHM) (rads) and  $\theta$  is the Bragg angle (rads).

Theoretical densities ( $\rho$ ) were calculated from the following crystallographic equation:

$$\rho = \frac{\sum_i v_i * Z_i * M_i}{a^3 * N_A} \quad \text{Eq. S3}$$

where  $v_i$  is the stoichiometric coefficient,  $Z_i$  is the number of atom  $i$  per unit cell (face-centred cubic for a ceria system),  $M_i$  is the molar mass of atom  $i$  in  $\text{g}\cdot\text{mol}^{-1}$ ,  $a$  is the lattice parameter from XRD patterns and  $N_A$  is Avogadro's number.

##### Electrochemical characterisation

The following equation was used to calculate the bulk conductivity ( $\sigma_{\text{GI}}$ ), grain-boundary conductivity ( $\sigma_{\text{GB}}$ ), and total conductivity ( $\sigma_t$ ) of the GDC samples:

$$\sigma = L/RA \quad \text{Eq. S4}$$

Where  $\sigma$  is the electrical conductivity,  $L$  is the thickness of the prepared GDC pellet,  $A$  is the electrode surface area contacting with the ceramic pellet (the silver coating), and  $R$  ( $R_{\text{GI}}$ ,  $R_{\text{GB}}$ , and  $R_t$ ) are resistances calculated by modelling analogous circuits.

The electrical conductivity and activation energy were estimated by a temperature-dependent Arrhenius conductivity model as below:

$$\sigma_T = \sigma_0 e^{-Ea/kT} \quad \text{Eq. S5}$$

Where  $Ea$  is the activation energy,  $\sigma_T$  is the temperature-dependent electrical conductivity,  $T$  is the absolute temperature,  $K$  is the Boltzmann constant ( $1.36 \times 10^{-23}$  J/K), and  $\sigma_0$  is a pre-exponential factor representing the intrinsic conductivity of the electrolyte polycrystalline structure.



## Results and discussion

Table S1 Lattice parameters and particle size of sintered pellets and GDC (reference card).

| Sample               | Lattice parameter (Å) | Particle size (nm) |
|----------------------|-----------------------|--------------------|
| 5LB1C-1              | 5.423                 | 37.54              |
| 5LB1C-2              | 5.431                 | 33.62              |
| 5LB1C-3              | 5.430                 | 29.09              |
| 5LB-1                | 5.419                 | 35.87              |
| 5LB-2                | 5.426                 | 32.31              |
| 5LB-3                | 5.425                 | 29.04              |
| GDC (reference card) | 5.423                 | -                  |

The measurement average error:  $\leq \pm 0.1\%$ .

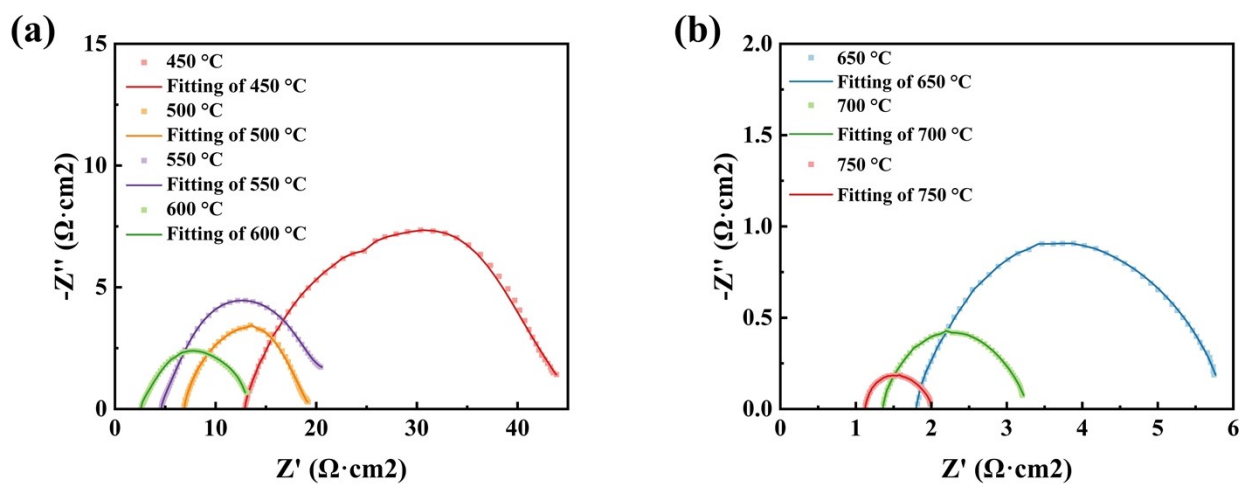

Figure S1 (a) Nyquist plots and fitting curves of 5LB1C-1 at 450, 500, 550, 600 °C, (b) Nyquist plots and fitting curves of 5LB1C-1 at 650, 700, 750 °C.

## Notes and references

1. I. Unal, S. Meisuria, M. Choolaei, T. R. Reina and B. A. Horri, *Ceramics International*, 2018, **44**, 6851-6860.
